# Supplementary material
Source: PubMed Central journal article supplement (PMC8330146)

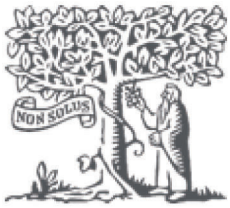

ELSEVIER

# Certificate of Elsevier Language Editing Services

The following article was edited by Elsevier Language Editing Services:  
"Fully Automated Unified Prognosis of Covid-19 Chest X-  
ray/CT Scan Images Enabled by Deep Covix-Net Model"

Authored by:  
Prof. Adamu Murtala Zungeru

Date: 24-Jul-2021

Serial number: LE-216980-430AE9F0F522

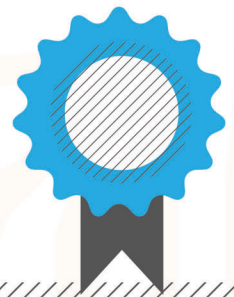

Supplement: mmc1.pdf [file mmc1.pdf]
